# Supplementary material
Source: Research Square preprint supplement (doi:10.21203/rs.3.rs-8752000/v1)
Supplement: Supplementary file 1 [file c0721459e478cb1dad0e1006.docx]

**Table S1.** Summary of residuals diagnostic between LOI-SOC and DC-SOC for the data segmentations where higher accuracy was observed.

| Region | Horizon | Samples with IC | Samples without IC | Treatment | n | MAE | MedAE | RMSE | CCC | SW | KS | Sk | Kt |
| --- | --- | --- | --- | --- | --- | --- | --- | --- | --- | --- | --- | --- | --- |
|  |  |  |  | LOI360 | 423 | 0.36 | 0.22 | 0.57 | 0.80 | 1.95E-17 | 1.77E-08 | -0.87 | 8.78 |
| All | All | X | X | LOI400 | 423 | 0.39 | 0.27 | 0.58 | 0.79 | 5.24E-15 | 6.53E-04 | -0.72 | 7.84 |
|  |  |  |  | LOI550 | 423 | 0.53 | 0.42 | 0.72 | 0.64 | 2.62E-10 | 1.51E-02 | -0.34 | 6.34 |
| All | All |  | X | LOI360 | 187 | 0.30 | 0.21 | 0.44 | 0.88 | 1.88E-08 | 0.07 | 0.02 | 7.75 |
| LOI400 | 187 | 0.30 | 0.23 | 0.41 | 0.89 | 2.31E-06 | 0.12 | 1.00 | 5.38 |
| LOI550 | 187 | 0.42 | 0.32 | 0.64 | 0.70 | 2.55E-13 | 0.07 | -0.93 | 13.00 |
| All | All | X |  | LOI360 | 236 | 0.38 | 0.21 | 0.60 | 0.70 | 5.02E-13 | 1.84E-06 | 0.06 | 8.88 |
| LOI400 | 236 | 0.42 | 0.27 | 0.63 | 0.66 | 2.29E-10 | 3.50E-03 | 0.30 | 7.41 |
| LOI550 | 236 | 0.46 | 0.31 | 0.64 | 0.65 | 2.53E-07 | 1.73E-02 | 0.26 | 6.51 |
| All | A | X | X | LOI360 | 203 | 0.50 | 0.29 | 0.74 | 0.59 | 1.19E-10 | 8.28E-05 | 0.00 | 6.84 |
| LOI400 | 203 | 0.48 | 0.28 | 0.74 | 0.61 | 6.05E-12 | 5.96E-05 | -0.13 | 7.14 |
| LOI550 | 203 | 0.56 | 0.33 | 0.85 | 0.45 | 1.11E-10 | 2.67E-03 | 0.46 | 7.39 |
|  |  |  |  | LOI360 | 134 | 0.29 | 0.20 | 0.42 | 0.87 | 1.70E-07 | 0.13 | -0.96 | 7.57 |
| All | A |  | X | LOI400 | 134 | 0.29 | 0.25 | 0.42 | 0.86 | 1.00E-08 | 0.09 | 1.67 | 9.94 |
|  |  |  |  | LOI550 | 134 | 0.36 | 0.23 | 0.64 | 0.62 | 7.00E-14 | 1.66E-03 | -0.20 | 14.79 |
|  |  |  |  | LOI360 | 168 | 0.32 | 0.14 | 0.59 | 0.86 | 4.57E-16 | 4.57E-10 | -2.28 | 14.31 |
| DML | All | X | X | LOI400 | 168 | 0.34 | 0.18 | 0.59 | 0.85 | 2.09E-14 | 2.22E-05 | -1.85 | 12.75 |
|  |  |  |  | LOI550 | 168 | 0.50 | 0.38 | 0.71 | 0.78 | 2.35E-08 | 1.09E-01 | -0.95 | 7.90 |
| DML | All |  | X | LOI360 | 60 | 0.25 | 0.19 | 0.33 | 0.97 | 0.06 | 0.29 | 0.53 | 3.50 |
| LOI400 | 60 | 0.28 | 0.25 | 0.36 | 0.96 | 3.62E-03 | 0.34 | 0.82 | 3.34 |
| LOI550 | 60 | 0.29 | 0.21 | 0.40 | 0.95 | 0.06 | 0.32 | 0.45 | 4.44 |
| IES | All | X | X | LOI360 | 134 | 0,38 | 0.30 | 0.50 | 0.78 | 1.36E-03 | 0.20 | -0.52 | 4.48 |
| LOI400 | 134 | 0.38 | 0.31 | 0.49 | 0.79 | 0.29 | 0.98 | -0.13 | 3.78 |
| LOI550 | 134 | 0.53 | 0.43 | 0.69 | 0.49 | 3.98E-04 | 0.12 | -0.30 | 4.70 |
|  |  |  |  | LOI360 | 52 | 0.24 | 0.13 | 0.39 | 0.93 | 4.80E-07 | 6.54E-04 | -1.38 | 6.05 |
| IES | All | X |  | LOI400 | 52 | 0.32 | 0.24 | 0.44 | 0.91 | 1.85E-03 | 0.34 | -1.01 | 4.31 |
|  |  |  |  | LOI550 | 52 | 0.27 | 0.17 | 0.38 | 0.93 | 1.29E-03 | 0.35 | -0.66 | 5.10 |
| NWP | All |  | X | LOI360 | 34 | 0.24 | 0.16 | 0.41 | 0.87 | 1.45E-07 | 0.10 | 3.32 | 16.67 |
|  | LOI400 | 34 | 0.26 | 0.19 | 0.39 | 0.88 | 7.44E-06 | 0.52 | 2.58 | 12.66 |
|  | LOI550 | 34 | 0.23 | 0.18 | 0.31 | 0.93 | 0.12 | 0.84 | 0.86 | 4.45 |
|  |  |  |  | LOI360 | 29 | 0.11 | 0.11 | 0.13 | 0.98 | 0.56 | 0.85 | -0.29 | 2.25 |
| SIDP | All | X | X | LOI400 | 29 | 0.17 | 0.12 | 0.21 | 0.93 | 0.91 | 1.00 | 0.07 | 2.93 |
|  |  |  |  | LOI550 | 29 | 0.21 | 0.18 | 0.26 | 0.89 | 0.67 | 1.00 | 0.18 | 2.17 |

Region = Landform Region; IC = inorganic carbon; n = number of samples evaluated. MAE = mean average error; MedAE = median average error; RMSE = root mean square error; CCC = concordance correlation coefficient; SW = Shapiro Wilks test; KS = Kolmogorov-Smirnoff test; SK = skewness; Kt = kurtosis.
